# Supplementary material for: The comparative landscape of duplications in Heliconius melpomene and Heliconius cydno
Source: PubMed Central journal article supplement (PMC5176112; doi:10.1038/hdy.2016.107), 2016-12-07
Supplement: hdy2016107x2.pdf [file hdy2016107x2.pdf]

| ID     | Submission | Accession number | Taxon                         | Sex    | Country       | Latitude  | Longitude  | Sequencing Center |
|--------|------------|------------------|-------------------------------|--------|---------------|-----------|------------|-------------------|
| c511   | SRA106228  | SRR1057584       | <i>H. cydno galanthus</i>     | Female | Costa Rica    | 10°16' N  | 84°11' W   | BGI               |
| c512   | SRA106228  | SRR1057585       | <i>H. cydno galanthus</i>     | Male   | Costa Rica    | 9°40' N   | 83°2' W    | BGI               |
| c513   | SRA106228  | SRR1057586       | <i>H. cydno galanthus</i>     | Male   | Costa Rica    | 10° 26' N | 83° 59' W  | BGI               |
| c514   | SRA106228  | SRR1057587       | <i>H. cydno galanthus</i>     | Female | Costa Rica    | 9°43' N   | 83°3' W    | BGI               |
| c515   | SRA106228  | SRR1057588       | <i>H. cydno galanthus</i>     | Female | Costa Rica    | 10° 13' N | 83° 41' W  | BGI               |
| c563   | SRA106228  | SRR1057589       | <i>H. cydno galanthus</i>     | Male   | Costa Rica    | 10° 13' N | 83° 47' W  | BGI               |
| c614   | SRA106228  | SRR1057590       | <i>H. cydno galanthus</i>     | Male   | Costa Rica    | 9°43' N   | 83°3' W    | BGI               |
| c630   | SRA106228  | SRR1057591       | <i>H. cydno galanthus</i>     | Female | Costa Rica    | 10° 26' N | 83° 59' W  | BGI               |
| c639   | SRA106228  | SRR1057592       | <i>H. cydno galanthus</i>     | Male   | Costa Rica    | 10° 13' N | 83° 41' W  | BGI               |
| c640   | SRA106228  | SRR1057593       | <i>H. cydno galanthus</i>     | Female | Costa Rica    | 9°43' N   | 83°3' W    | BGI               |
| m523   | SRA106228  | SRR1057594       | <i>H. melpomene rosina</i>    | Male   | Costa Rica    | 9°43' N   | 83°3' W    | BGI               |
| m524   | SRA106228  | SRR1057595       | <i>H. melpomene rosina</i>    | Female | Costa Rica    | 9°51'0N   | 84°19' W   | BGI               |
| m525   | SRA106228  | SRR1057596       | <i>H. melpomene rosina</i>    | Male   | Costa Rica    | 8°28' N   | 83°35' W   | BGI               |
| m589   | SRA106228  | SRR1057597       | <i>H. melpomene rosina</i>    | Male   | Costa Rica    | 9°52' N   | 83°0' W    | BGI               |
| m675   | SRA106228  | SRR1057598       | <i>H. melpomene rosina</i>    | Male   | Costa Rica    | 9°24' N   | 84°10' W   | BGI               |
| m676   | SRA106228  | SRR1057599       | <i>H. melpomene rosina</i>    | Male   | Costa Rica    | 9°43' N   | 83°3' W    | BGI               |
| m682   | SRA106228  | SRR1057600       | <i>H. melpomene rosina</i>    | Male   | Costa Rica    | 10°26' N  | 83°59' W   | BGI               |
| m683   | SRA106228  | SRR1057601       | <i>H. melpomene rosina</i>    | Male   | Costa Rica    | 9°24' N   | 84°10' W   | BGI               |
| m687   | SRA106228  | SRR1057602       | <i>H. melpomene rosina</i>    | Female | Costa Rica    | 10°26' N  | 83°59' W   | BGI               |
| m689   | SRA106228  | SRR1057603       | <i>H. melpomene rosina</i>    | Female | Costa Rica    | 9°51'0N   | 84°19' W   | BGI               |
| 247-1  | ERA206886  | ERR260277        | <i>H. melpomene rosina</i>    | Male   | Panama        | 9°1206' N | 79°6969' W | The GenePool      |
| 247-2  | ERA206886  | ERR260278        | <i>H. melpomene rosina</i>    | Male   | Panama        | 9°1206' N | 79°6969' W | The GenePool      |
| 247-3  | ERA206886  | ERR260279        | <i>H. melpomene rosina</i>    | Male   | Panama        | 9°1206' N | 79°6969' W | The GenePool      |
| 248-4  | ERA206886  | ERR260280        | <i>H. melpomene rosina</i>    | Male   | Panama        | 9°1206' N | 79°6969' W | The GenePool      |
| 248-5  | ERA206886  | ERR260281        | <i>H. melpomene melpomene</i> | Male   | French Guiana | 4°9632' N | 52°4200' W | The GenePool      |
| 248-6  | ERA206886  | ERR260282        | <i>H. melpomene melpomene</i> | Male   | French Guiana | 4°9632' N | 52°4200' W | The GenePool      |
| 248-7  | ERA206886  | ERR260283        | <i>H. melpomene melpomene</i> | Male   | French Guiana | 4°9632' N | 52°4200' W | The GenePool      |
| 249-8  | ERA206886  | ERR260284        | <i>H. melpomene melpomene</i> | Male   | French Guiana | 4°9151' N | 52°3755' W | The GenePool      |
| 249-9  | ERA206886  | ERR260285        | <i>H. melpomene melpomene</i> | Female | Panama        | 8°6136' N | 78°1398' W | The GenePool      |
| 249-10 | ERA206886  | ERR260286        | <i>H. melpomene melpomene</i> | Male   | Panama        | 8°2797' N | 77°8098' W | The GenePool      |
| 252-19 | ERA206886  | ERR260295        | <i>H. cydno chioneus</i>      | Male   | Panama        | 9°1714' N | 79°7573' W | The GenePool      |
| 252-20 | ERA206886  | ERR260296        | <i>H. cydno chioneus</i>      | Male   | Panama        | 9°1714' N | 79°7573' W | The GenePool      |
| 252-21 | ERA206886  | ERR260297        | <i>H. cydno chioneus</i>      | Male   | Panama        | 9°1714' N | 79°7573' W | The GenePool      |
| 252-22 | ERA206886  | ERR260298        | <i>H. cydno chioneus</i>      | Male   | Panama        | 9°1714' N | 79°7573' W | The GenePool      |

| Mean read-depth | Total raw reads | Mapped reads | Unmapped reads |
|-----------------|-----------------|--------------|----------------|
| 14.57           | 56980695        | 54904440     | 2076255        |
| 14.67           | 57786331        | 55444921     | 2341410        |
| 14.83           | 58047481        | 56045188     | 2002293        |
| 14.73           | 57576892        | 55612600     | 1964292        |
| 14.70           | 57606552        | 55532956     | 2073596        |
| 13.83           | 54029777        | 52103112     | 1926665        |
| 14.81           | 57793383        | 55949422     | 1843961        |
| 13.83           | 54218576        | 52122166     | 2096410        |
| 14.84           | 57839669        | 55879865     | 1959804        |
| 14.82           | 57905245        | 55775583     | 2129662        |
| 14.94           | 58408944        | 55702153     | 2706791        |
| 15.03           | 57327760        | 55904796     | 1422964        |
| 14.58           | 58361427        | 54333551     | 4027876        |
| 14.92           | 56991140        | 55771647     | 1219493        |
| 15.07           | 57387640        | 56029868     | 1357772        |
| 13.63           | 53924476        | 50738856     | 3185620        |
| 14.96           | 57455142        | 55639521     | 1815621        |
| 14.19           | 54047170        | 52772924     | 1274246        |
| 15.06           | 57500817        | 56116208     | 1384609        |
| 14.71           | 57496048        | 54767875     | 2728173        |
| 26.9            | 80357189        | 77576309     | 2780880        |
| 26.7            | 80780396        | 77202364     | 3578032        |
| 26.5            | 79483045        | 76412158     | 3070887        |
| 36.7            | 109113325       | 106534913    | 2578412        |
| 24.1            | 89838758        | 71357196     | 18481562       |
| 23.1            | 83950002        | 68504773     | 15445229       |
| 35.0            | 107926916       | 104283723    | 3643193        |
| 35.8            | 110399158       | 106326491    | 4072667        |
| 62.0            | 190117929       | 184629062    | 5488867        |
| 15.6            | 47146484        | 44511911     | 2634573        |
| 35.8            | 111609395       | 105025362    | 6584033        |
| 35.3            | 108838440       | 103731516    | 5106924        |
| 39.2            | 119944299       | 115366463    | 4577836        |
| 46.0            | 146341596       | 135597591    | 10744005       |
