# Supplementary material for: The comparative landscape of duplications in Heliconius melpomene and Heliconius cydno
Source: PubMed Central journal article supplement (PMC5176112; doi:10.1038/hdy.2016.107), 2016-12-07
Supplement: hdy2016107x3.pdf [file hdy2016107x3.pdf]

| ID | PANTHER_GO-Slim_Biological_Process         | D.melanogaster-REFLIST(13690) | HeliconiusSet(959) |
|----|--------------------------------------------|-------------------------------|--------------------|
| 1  | pentose-phosphate_shunt(GO:0006098)        | 7                             | 9                  |
| 2  | peroxisomal_transport(GO:0043574)          | 14                            | 8                  |
| 3  | vitamin_biosynthetic_process(GO:0009110)   | 27                            | 9                  |
| 4  | cellular_amino_acid_biosynthetic_process(C | 61                            | 20                 |
| 5  | respiratory_electron_transport_chain(GO:00 | 238                           | 64                 |
| 6  | DNA_replication(GO:0006260)                | 86                            | 23                 |
| 7  | vitamin_transport(GO:0051180)              | 50                            | 13                 |
| 8  | generation_of_precursor_metabolites_and_   | 287                           | 64                 |
| 9  | protein_glycosylation(GO:0006486)          | 98                            | 21                 |
| 10 | DNA_metabolic_process(GO:0006259)          | 232                           | 46                 |
| 11 | proteolysis(GO:0006508)                    | 606                           | 111                |
| 12 | steroid_metabolic_process(GO:0008202)      | 159                           | 26                 |
| 13 | primary_metabolic_process(GO:0044238)      | 4149                          | 355                |
| 14 | Unclassified(UNCLASSIFIED)                 | 7319                          | 529                |
| 15 | cellular_process(GO:0009987)               | 2878                          | 134                |
| 16 | biological_regulation(GO:0065007)          | 1560                          | 69                 |
| 17 | RNA_metabolic_process(GO:0016070)          | 1039                          | 41                 |
| 18 | cell_communication(GO:0007154)             | 914                           | 35                 |
| 19 | transcription,_DNA-dependent(GO:0006351    | 729                           | 27                 |
| 20 | regulation_of_biological_process(GO:00507  | 1104                          | 35                 |
| 21 | developmental_process(GO:0032502)          | 546                           | 17                 |
| 22 | phosphate-containing_compound_metaboli     | 539                           | 16                 |
| 23 | response_to_stimulus(GO:0050896)           | 739                           | 19                 |
| 24 | translation(GO:0006412)                    | 387                           | 9                  |
| 25 | response_to_stress(GO:0006950)             | 285                           | 4                  |
| 26 | immune_system_process(GO:0002376)          | 288                           | 4                  |
| 27 | protein_phosphorylation(GO:0006468)        | 266                           | 2                  |

| HeliconiusSet(expected) | (observed-expected)/expected | HeliconiusSet(over/under) | HeliconiusSet(foldEnrichment) | HeliconiusSet |
|-------------------------|------------------------------|---------------------------|-------------------------------|---------------|
| 0,49                    |                              | 17,36734694 +             | 18.35                         | 5.40E-07      |
| 0,98                    |                              | 7,163265306 +             | 8.16                          | 1.67E-03      |
| 1,89                    |                              | 3,761904762 +             | 4.76                          | 2.96E-02      |
| 4,27                    |                              | 3,683840749 +             | 4.68                          | 5.01E-06      |
| 16,67                   |                              | 2,839232154 +             | 3.84                          | 5.72E-17      |
| 6,02                    |                              | 2,820598007 +             | 3.82                          | 1.79E-05      |
| 3,5                     |                              | 2,714285714 +             | 3.71                          | 1.41E-02      |
| 20,1                    |                              | 2,184079602 +             | 3.18                          | 3.74E-13      |
| 6,87                    |                              | 2,056768559 +             | 3.06                          | 1.90E-03      |
| 16,25                   |                              | 1,830769231 +             | 2.83                          | 1.46E-07      |
| 42,45                   |                              | 1,614840989 +             | 2.61                          | 2.33E-17      |
| 11,14                   |                              | 1,333931777 +             | 2.33                          | 1.71E-02      |
| 290,64                  |                              | 0,221442334 +             | 1.22                          | 9.94E-04      |
| 512,7                   |                              | 0,031792471 +             | 1.03                          | 0.00E00       |
| 201,61                  |                              | -0,335350429 -            | .66                           | 2.46E-06      |
| 109,28                  |                              | -0,368594436 -            | .63                           | 1.75E-03      |
| 72,78                   |                              | -0,436658423 -            | .56                           | 3.84E-03      |
| 64,03                   |                              | -0,453381228 -            | .55                           | 6.37E-03      |
| 51,07                   |                              | -0,471313883 -            | .53                           | 2.26E-02      |
| 77,34                   |                              | -0,547452806 -            | .45                           | 3.87E-06      |
| 38,25                   |                              | -0,555555556 -            | .44                           | 1.44E-02      |
| 37,76                   |                              | -0,576271186 -            | .42                           | 8.12E-03      |
| 51,77                   |                              | -0,63299208 -             | .37                           | 1.65E-05      |
| 27,11                   |                              | -0,668019181 -            | .33                           | 8.62E-03      |
| 19,96                   |                              | -0,799599198 -            | .20                           | 2.92E-03      |
| 20,17                   |                              | -0,801685672 -            | 0.2                           | 2.45E-03      |
| 18,63                   |                              | -0,892646269 -            | 0.2                           | 2.59E-04      |

t(P-value)
