# Supplementary material for: The comparative landscape of duplications in Heliconius melpomene and Heliconius cydno
Source: PubMed Central journal article supplement (PMC5176112; doi:10.1038/hdy.2016.107), 2016-12-07
Supplement: hdy2016107x4.pdf [file hdy2016107x4.pdf]

| Family ID      | Mapped ID                                   |         |
|----------------|---------------------------------------------|---------|
| PTHR10009      |                                             | 492     |
| PTHR10353:SF36 | 342,89,387,673,558,826,608,361              |         |
| PTHR10353      | 819,362,463,672,386,452,343,257,466,246,379 |         |
| PTHR10380      |                                             | 794     |
| PTHR10492      | 473,113,830,832,848,508                     |         |
| PTHR10632:SF2  |                                             | 430,854 |
| PTHR10632      |                                             | 431,855 |
| PTHR10642      |                                             | 360     |
| PTHR10695      | 132,638,716                                 |         |
| PTHR10799      | 253,676,799,327,605,560                     |         |
| PTHR10989      |                                             | 833     |
| PTHR11011:SF26 | 167,772,169,774,724,726,914,916             |         |
| PTHR11011      | 168,773,775,725,170,727,915,917             |         |
| PTHR11012      | 355,658,690                                 |         |
| PTHR11012:SF5  |                                             | 689     |
| PTHR11069      |                                             | 804,14  |
| PTHR11117      |                                             | 487     |
| PTHR11117:SF2  |                                             | 486     |
| PTHR11257:SF2  | 561,485,661,148,9,171                       |         |
| PTHR11257      | 484,495,562,662,578,149,513,515,381,172,10  |         |
| PTHR11257:SF5  | 512,579,514,382,494                         |         |
| PTHR11559      | 596,696,314,80,272,196,928,461              |         |
| PTHR11610      | 310,245,37,679,736,936                      |         |
| PTHR11616      | 388,137,655,437,900,812                     |         |
| PTHR11920      | 165,793,164                                 |         |
| PTHR11926      |                                             | 58,598  |
| PTHR11950      |                                             | 642     |
| PTHR12236      | 740,872,373                                 |         |
| PTHR12236:SF15 |                                             | 873     |

|                 |                                         |         |
|-----------------|-----------------------------------------|---------|
| PTHR12236:SF2   |                                         | 741     |
| PTHR12236:SF6   |                                         | 372     |
| PTHR12315       |                                         | 330,125 |
| PTHR12315:SF0   |                                         | 124,329 |
| PTHR12411       | 465,48,269,592                          |         |
| PTHR12587:SF20  | 782,278,367,345,820,869,250,807         |         |
| PTHR12587       | 783,344,366,279,821,932,868,825,251,806 |         |
| PTHR12832       | 920,717,838                             |         |
| PTHR12863       |                                         | 896,901 |
| PTHR12863:SF1   |                                         | 902     |
| PTHR13799       | 703,758,729                             |         |
| PTHR13799:SF13  | 757,704,728                             |         |
| PTHR13856       |                                         | 754,708 |
| PTHR14445       |                                         | 432,489 |
| PTHR14445:SF38  |                                         | 488     |
| PTHR14517       |                                         | 940,315 |
| PTHR14624       |                                         | 365,849 |
| PTHR14677:SF2   |                                         | 334,337 |
| PTHR14677       |                                         | 335,336 |
| PTHR15863       |                                         | 851     |
| PTHR15863:SF2   |                                         | 850     |
| PTHR16089:SF29  | 189,630,888,509                         |         |
| PTHR16089       | 188,510,889,629                         |         |
| PTHR16441       |                                         | 422,39  |
| PTHR16441:SF0   |                                         | 421     |
| PTHR16453       |                                         | 737     |
| PTHR18966       |                                         | 143     |
| PTHR18966:SF188 |                                         | 142     |
| PTHR19446:SF371 |                                         | 660     |
| PTHR19446:SF364 | 444,427,174,581                         |         |

|                 |                                             |         |
|-----------------|---------------------------------------------|---------|
| PTHR19446:SF376 |                                             | 503     |
| PTHR19446:SF244 | 451,275,441,632,720,280,185,87              |         |
| PTHR19446:SF355 | 584,222,255,586,443,26,952,226,228,418,518  |         |
| PTHR19446:SF320 | 882,201,214,547,618                         |         |
| PTHR19446:SF358 |                                             | 110,809 |
| PTHR19446:SF363 |                                             | 929     |
| PTHR19446:SF352 | 47,470,261,262,780,265,266,157,498,454,158, |         |
| PTHR19446       | 88,46,274,312,631,159,831,711,953,876,877,9 |         |
| PTHR19964       |                                             | 398     |
| PTHR20988       |                                             | 41,68   |
| PTHR20988:SF2   |                                             | 40,681  |
| PTHR21311:SF0   |                                             | 692     |
| PTHR21311       |                                             | 691     |
| PTHR22605       |                                             | 951     |
| PTHR22807       | 212,841,152                                 |         |
| PTHR22847       |                                             | 317,182 |
| PTHR22990       | 299,941,501,568,843,947,131,351,285         |         |
| PTHR23022       | 12,761,14,950,16,698,665,667,669,803        |         |
| PTHR23110       |                                             | 292     |
| PTHR23188       | 880,797,937                                 |         |
| PTHR23227       | 99,331,640,762,114,126,303,348,128,481      |         |
| PTHR23227:SF47  |                                             | 115     |
| PTHR23227:SF45  |                                             | 332,304 |
| PTHR23227:SF41  | 100,641,763,127,129,482                     |         |
| PTHR23259       | 346,347,927,141                             |         |
| PTHR23278       |                                             | 2       |
| PTHR23504:SF31  | 288,289,82,72                               |         |
| PTHR23504       | 290,71,291,83                               |         |
| PTHR23507       |                                             | 723     |
| PTHR23507:SF4   |                                             | 722     |

|                 |                                             |         |
|-----------------|---------------------------------------------|---------|
| PTHR24026       |                                             | 45,37   |
| PTHR24026:SF51  |                                             | 44,371  |
| PTHR24073       | 220,133,135,765,216,218,98                  |         |
| PTHR24073:SF445 | 215,217,97                                  |         |
| PTHR24073:SF330 |                                             | 134,136 |
| PTHR24073:SF472 |                                             | 764     |
| PTHR24221:SF138 |                                             | 671,28  |
| PTHR24221       | 907,540,553,776,600,29,733,394,906,296,670  |         |
| PTHR24230       |                                             | 249     |
| PTHR24260:SF53  |                                             | 231     |
| PTHR24260       | 375,420,835,230                             |         |
| PTHR24276       |                                             | 311,635 |
| PTHR24291       | 550,234,105,866,404,391,506,815,240,252     |         |
| PTHR24292       | 25,380,383,890,153,267,300,433,785,721,623, |         |
| PTHR24305       | 36,565,898                                  |         |
| PTHR24321:SF6   |                                             | 69      |
| PTHR24321       |                                             | 70      |
| PTHR24409       |                                             | 523,316 |
| PTHR24559:SF179 |                                             | 449     |
| PTHR24559       | 861,643,368,236,448                         |         |
| PTHR24559:SF208 | 862,644,369                                 |         |
| PTHR24559:SF190 |                                             | 235     |
| PTHR28576       | 66,555,423,801                              |         |
| PTHR28576:SF4   |                                             | 67,556  |
| PTHR31449       |                                             | 895     |
| PTHR31449:SF3   |                                             | 894     |
| PTHR33273       |                                             | 904     |
| PTHR33332       | 68,353,464,544,247,545,402,546,954,747,748, |         |
| PTHR35450       | 154,474,685,674,686,931,921,800,305,306,95! |         |
| PTHR19446:SF244 | 451,275,441,632,720,280,185,87              |         |

|                 |                                             |
|-----------------|---------------------------------------------|
| PTHR19446:SF355 | 584,222,255,586,443,26,952,226,228,418,518  |
| PTHR19446:SF320 | 882,201,214,547,618                         |
| PTHR19446:SF358 | 110,809                                     |
| PTHR19446:SF363 | 929                                         |
| PTHR19446:SF352 | 47,470,261,262,780,265,266,157,498,454,158, |
| PTHR19446       | 88,46,274,312,631,159,831,711,953,876,877,9 |
| PTHR19964       | 398                                         |
| PTHR20988       | 41,68                                       |
| PTHR20988:SF2   | 40,681                                      |
| PTHR21311:SF0   | 692                                         |
| PTHR21311       | 691                                         |
| PTHR22605       | 951                                         |
| PTHR22807       | 212,841,152                                 |
| PTHR22847       | 317,182                                     |
| PTHR22990       | 299,941,501,568,843,947,131,351,285         |
| PTHR23022       | 12,761,14,950,16,698,665,667,669,803        |
| PTHR23110       | 292                                         |
| PTHR23188       | 880,797,937                                 |
| PTHR23227       | 99,331,640,762,114,126,303,348,128,481      |
| PTHR23227:SF47  | 115                                         |
| PTHR23227:SF45  | 332,304                                     |
| PTHR23227:SF41  | 100,641,763,127,129,482                     |
| PTHR23259       | 346,347,927,141                             |
| PTHR23278       | 2                                           |
| PTHR23504:SF31  | 288,289,82,72                               |
| PTHR23504       | 290,71,291,83                               |
| PTHR23507       | 723                                         |
| PTHR23507:SF4   | 722                                         |
| PTHR24026       | 45,37                                       |
| PTHR24026:SF51  | 44,371                                      |

|                 |                                             |         |
|-----------------|---------------------------------------------|---------|
| PTHR24073       | 220,133,135,765,216,218,98                  |         |
| PTHR24073:SF445 | 215,217,97                                  |         |
| PTHR24073:SF330 |                                             | 134,136 |
| PTHR24073:SF472 |                                             | 764     |
| PTHR24221:SF138 |                                             | 671,28  |
| PTHR24221       | 907,540,553,776,600,29,733,394,906,296,670  |         |
| PTHR24230       |                                             | 249     |
| PTHR24260:SF53  |                                             | 231     |
| PTHR24260       | 375,420,835,230                             |         |
| PTHR24276       |                                             | 311,635 |
| PTHR24291       | 550,234,105,866,404,391,506,815,240,252     |         |
| PTHR24292       | 25,380,383,890,153,267,300,433,785,721,623, |         |
| PTHR24305       | 36,565,898                                  |         |
| PTHR24321:SF6   |                                             | 69      |
| PTHR24321       |                                             | 70      |
| PTHR24409       |                                             | 523,316 |
| PTHR24559:SF179 |                                             | 449     |
| PTHR24559       | 861,643,368,236,448                         |         |
| PTHR24559:SF208 | 862,644,369                                 |         |
| PTHR24559:SF190 |                                             | 235     |
| PTHR28576       | 66,555,423,801                              |         |
| PTHR28576:SF4   |                                             | 67,556  |
| PTHR31449       |                                             | 895     |
| PTHR31449:SF3   |                                             | 894     |
| PTHR33273       |                                             | 904     |
| PTHR33332       | 68,353,464,544,247,545,402,546,954,747,748, |         |
| PTHR35450       | 154,474,685,674,686,931,921,800,305,306,95! |         |

| Family name                                                                                | Genes |
|--------------------------------------------------------------------------------------------|-------|
| PROTEIN YELLOW-RELATED                                                                     | 40    |
| PROTEIN KLO-1-RELATED                                                                      | 117   |
| GLYCOSYL HYDROLASE                                                                         | 588   |
| CUTICLE PROTEIN                                                                            | 379   |
| UNCHARACTERIZED                                                                            | 452   |
| SULFIDE:QUINONE OXIDOREDUCTASE, MITOCHONDRIAL                                              | 60    |
| SULFIDE:QUINONE OXIDOREDUCTASE                                                             | 83    |
| RIBONUCLEASE H1                                                                            | 188   |
| DEPHOSPHO-COA KINASE-RELATED                                                               | 202   |
| SWI/SNF-RELATED MATRIX-ASSOCIATED ACTIN-DEPENDENT REGULATOR OF CHROMATIN SUBFAMILY-RELATED | 2255  |
| ANDROGEN-INDUCED PROTEIN 1-RELATED                                                         | 80    |
| CONTACTIN-5                                                                                | 94    |
| MALE STERILITY PROTEIN 2-RELATED                                                           | 227   |
| UNCHARACTERIZED                                                                            | 137   |
| SUBFAMILY NOT NAMED                                                                        | 6     |
| GLUCOSYLCERAMIDASE                                                                         | 114   |
| SUCCINYL-COA SYNTHETASE-RELATED                                                            | 145   |
| SUCCINYL-COA LIGASE [ADP/GDP-FORMING] SUBUNIT ALPHA, MITOCHONDRIAL                         | 111   |
| EJACULATORY BULB-SPECIFIC PROTEIN 3-RELATED                                                | 8     |
| CHEMOSENSORY PROTEIN-RELATED                                                               | 15    |
| MIP15436P                                                                                  | 2     |
| CARBOXYLESTERASE                                                                           | 1013  |
| LIPASE                                                                                     | 319   |
| SODIUM/CHLORIDE DEPENDENT TRANSPORTER                                                      | 740   |
| ADENYLATE AND GUANYLATE CYCLASES                                                           | 965   |
| GLUCOSYL/GLUCURONOSYL TRANSFERASES                                                         | 2370  |
| RUNT RELATED                                                                               | 79    |
| STRUCTURAL CONTITUENT OF CUTICLE                                                           | 300   |
| CUTICULAR PROTEIN 30B-RELATED                                                              | 8     |

|                                                           |      |
|-----------------------------------------------------------|------|
| CUTICULAR PROTEIN 62BC, ISOFORM A                         | 2    |
| CUTICULAR PROTEIN 23B                                     | 8    |
| BICOID-INTERACTING PROTEIN RELATED                        | 78   |
| 7SK SNRNA METHYLPHOSPHATE CAPPING ENZYME                  | 52   |
| CYSTEINE PROTEASE FAMILY C1-RELATED                       | 1355 |
| LIPRIN-ALPHA, ISOFORM E                                   | 16   |
| LAR INTERACTING PROTEIN LIP -RELATED PROTEIN              | 154  |
| TESTIS-SPECIFIC PROTEIN PBS13 T-COMPLEX 11                | 125  |
| FATTY ACID HYDROXYLASE                                    | 73   |
| FATTY ACID 2-HYDROXYLASE                                  | 61   |
| NGG1 INTERACTING FACTOR 3                                 | 81   |
| GTP CYCLOHYDROLASE 1 TYPE 2 NIF3L1-RELATED                | 76   |
| VHS DOMAIN CONTAINING PROTEIN FAMILY                      | 436  |
| GRB10 INTERACTING GYF PROTEIN                             | 139  |
| PERQ AMINO ACID-RICH WITH GYF DOMAIN-CONTAINING PROTEIN 2 | 19   |
| RIB43A-RELATED                                            | 56   |
| DFG10 PROTEIN                                             | 61   |
| AN1-TYPE ZINC FINGER PROTEIN 1                            | 57   |
| ARSENITE INDUCIBLE RNA ASSOCIATED PROTEIN AIP-1-RELATED   | 137  |
| FAMILY NOT NAMED                                          | 30   |
| UPF0544 PROTEIN C5ORF45                                   | 30   |
| PROTEIN SAEG-1, ISOFORM A                                 | 10   |
| REST COREPRESSOR COREST PROTEIN-RELATED                   | 150  |
| FIDIPIDINE                                                | 50   |
| COILED-COIL DOMAIN-CONTAINING PROTEIN 93                  | 46   |
| WD40 DOMAIN-CONTAINING PROTEIN                            | 57   |
| IONOTROPIC GLUTAMATE RECEPTOR                             | 1019 |
| IONOTROPIC RECEPTOR 67C-RELATED                           | 7    |
| SUBFAMILY NOT NAMED                                       | 14   |
| SUBFAMILY NOT NAMED                                       | 20   |



|                                                            |      |
|------------------------------------------------------------|------|
| SUBFAMILY NOT NAMED                                        | 11   |
| SUBFAMILY NOT NAMED                                        | 43   |
| SUBFAMILY NOT NAMED                                        | 3    |
| SUBFAMILY NOT NAMED                                        | 23   |
| SUBFAMILY NOT NAMED                                        | 27   |
| SUBFAMILY NOT NAMED                                        | 3    |
| SUBFAMILY NOT NAMED                                        | 107  |
| REVERSE TRANSCRIPTASES                                     | 947  |
| MULTIPLE PDZ DOMAIN PROTEIN                                | 210  |
| UNCHARACTERIZED                                            | 26   |
| TRANSMEMBRANE PROTEIN 183A-RELATED                         | 26   |
| CONSERVED OLIGOMERIC GOLGI COMPLEX SUBUNIT 8               | 68   |
| CONSERVED OLIGOMERIC GOLGI COMPLEX COMPONENT 8             | 68   |
| UNCHARACTERIZED                                            | 86   |
| NOP2 YEAST -RELATED NOL1/NOP2/FMU SUN DOMAIN-CONTAINING    | 274  |
| WD40 REPEAT PROTEIN                                        | 1147 |
| F-BOX ONLY PROTEIN                                         | 127  |
| TRANSPOSABLE ELEMENT-RELATED                               | 209  |
| BTB DOMAIN TRANSCRIPTION FACTOR                            | 91   |
| FAMILY NOT NAMED                                           | 66   |
| BUCENTAUR RELATED                                          | 224  |
| SUBFAMILY NOT NAMED                                        | 35   |
| SUBFAMILY NOT NAMED                                        | 32   |
| SUBFAMILY NOT NAMED                                        | 9    |
| RIDDLE                                                     | 171  |
| SIDESTEP PROTEIN                                           | 92   |
| MAJOR FACILITATOR SUPERFAMILY DOMAIN-CONTAINING PROTEIN 10 | 34   |
| FAMILY NOT NAMED                                           | 357  |
| FAMILY NOT NAMED                                           | 171  |
| SUBFAMILY NOT NAMED                                        | 8    |

|                                             |      |
|---------------------------------------------|------|
| FAMILY NOT NAMED                            | 192  |
| PROTODHERIN-LIKE WING POLARITY PROTEIN STAN | 12   |
| FAMILY NOT NAMED                            | 3173 |
| RAS-RELATED PROTEIN RAB-3C                  | 15   |
| RAS-RELATED PROTEIN RAB-3D                  | 18   |
| RAB3A, MEMBER RAS ONCOGENE FAMILY           | 2    |
| LP14331P-RELATED                            | 366  |
| FAMILY NOT NAMED                            | 1188 |
| G-PROTEIN COUPLED RECEPTOR                  | 416  |
| PROTEIN TRY-5                               | 15   |
| FAMILY NOT NAMED                            | 289  |
| FAMILY NOT NAMED                            | 198  |
| FAMILY NOT NAMED                            | 685  |
| FAMILY NOT NAMED                            | 235  |
| FAMILY NOT NAMED                            | 311  |
| 3-HYDROXYBUTYRATE DEHYDROGENASE TYPE 2      | 23   |
| FAMILY NOT NAMED                            | 26   |
| FAMILY NOT NAMED                            | 551  |
| SUBFAMILY NOT NAMED                         | 10   |
| FAMILY NOT NAMED                            | 993  |
| KRAB-A DOMAIN-CONTAINING PROTEIN 2          | 40   |
| SUBFAMILY NOT NAMED                         | 21   |
| FAMILY NOT NAMED                            | 68   |
| SUBFAMILY NOT NAMED                         | 27   |
| FAMILY NOT NAMED                            | 29   |
| UPF0598 PROTEIN C8ORF82                     | 28   |
| FAMILY NOT NAMED                            | 59   |
| FAMILY NOT NAMED                            | 48   |
| FAMILY NOT NAMED                            | 14   |
| SUBFAMILY NOT NAMED                         | 43   |

|                                                            |      |
|------------------------------------------------------------|------|
| SUBFAMILY NOT NAMED                                        | 3    |
| SUBFAMILY NOT NAMED                                        | 23   |
| SUBFAMILY NOT NAMED                                        | 27   |
| SUBFAMILY NOT NAMED                                        | 3    |
| SUBFAMILY NOT NAMED                                        | 107  |
| REVERSE TRANSCRIPTASES                                     | 947  |
| MULTIPLE PDZ DOMAIN PROTEIN                                | 210  |
| UNCHARACTERIZED                                            | 26   |
| TRANSMEMBRANE PROTEIN 183A-RELATED                         | 26   |
| CONSERVED OLIGOMERIC GOLGI COMPLEX SUBUNIT 8               | 68   |
| CONSERVED OLIGOMERIC GOLGI COMPLEX COMPONENT 8             | 68   |
| UNCHARACTERIZED                                            | 86   |
| NOP2 YEAST -RELATED NOL1/NOP2/FMU SUN DOMAIN-CONTAINING    | 274  |
| WD40 REPEAT PROTEIN                                        | 1147 |
| F-BOX ONLY PROTEIN                                         | 127  |
| TRANSPOSABLE ELEMENT-RELATED                               | 209  |
| BTB DOMAIN TRANSCRIPTION FACTOR                            | 91   |
| FAMILY NOT NAMED                                           | 66   |
| BUCENTAUR RELATED                                          | 224  |
| SUBFAMILY NOT NAMED                                        | 35   |
| SUBFAMILY NOT NAMED                                        | 32   |
| SUBFAMILY NOT NAMED                                        | 9    |
| RIDDLE                                                     | 171  |
| SIDESTEP PROTEIN                                           | 92   |
| MAJOR FACILITATOR SUPERFAMILY DOMAIN-CONTAINING PROTEIN 10 | 34   |
| FAMILY NOT NAMED                                           | 357  |
| FAMILY NOT NAMED                                           | 171  |
| SUBFAMILY NOT NAMED                                        | 8    |
| FAMILY NOT NAMED                                           | 192  |
| PROTODHERIN-LIKE WING POLARITY PROTEIN STAN                | 12   |

|                                        |      |
|----------------------------------------|------|
| FAMILY NOT NAMED                       | 3173 |
| RAS-RELATED PROTEIN RAB-3C             | 15   |
| RAS-RELATED PROTEIN RAB-3D             | 18   |
| RAB3A, MEMBER RAS ONCOGENE FAMILY      | 2    |
| LP14331P-RELATED                       | 366  |
| FAMILY NOT NAMED                       | 1188 |
| G-PROTEIN COUPLED RECEPTOR             | 416  |
| PROTEIN TRY-5                          | 15   |
| FAMILY NOT NAMED                       | 289  |
| FAMILY NOT NAMED                       | 198  |
| FAMILY NOT NAMED                       | 685  |
| FAMILY NOT NAMED                       | 235  |
| FAMILY NOT NAMED                       | 311  |
| 3-HYDROXYBUTYRATE DEHYDROGENASE TYPE 2 | 23   |
| FAMILY NOT NAMED                       | 26   |
| FAMILY NOT NAMED                       | 551  |
| SUBFAMILY NOT NAMED                    | 10   |
| FAMILY NOT NAMED                       | 993  |
| KRAB-A DOMAIN-CONTAINING PROTEIN 2     | 40   |
| SUBFAMILY NOT NAMED                    | 21   |
| FAMILY NOT NAMED                       | 68   |
| SUBFAMILY NOT NAMED                    | 27   |
| FAMILY NOT NAMED                       | 29   |
| UPF0598 PROTEIN C8ORF82                | 28   |
| FAMILY NOT NAMED                       | 59   |
| FAMILY NOT NAMED                       | 48   |
| FAMILY NOT NAMED                       | 14   |

PANTHER GO-Slim Molecular function

PANTHER GO-Slim Biological Process

PANTHER GO-Slim Cellular Component

structural molecule activity(GO:0005198)

structural molecule activity(GO:0005198)

structural molecule activity(GO:0005198)

intracellular(GO:0044464)

intracellular(GO:0044464)

structural constituent of cytoskeleton(GO:0005198)

cytoskeleton(GO:0043226);intracellular(G

RNA binding(GO:0005488)

RNA binding(GO:0005488)



receptor activity(GO:0004872)





receptor activity(GO:0004872)

PANTHER Protein Class

structural protein(PC00211)

esterase(PC00121)

structural protein(PC00211)

structural protein(PC00211)

cytoskeletal protein(PC00085)

RNA binding protein(PC00171)

RNA binding protein(PC00171)



G-protein coupled receptor(PC00197)



G-protein coupled receptor(PC00197)
