# Supplementary material for: The comparative landscape of duplications in Heliconius melpomene and Heliconius cydno
Source: PubMed Central journal article supplement (PMC5176112; doi:10.1038/hdy.2016.107), 2016-12-07
Supplement: hdy2016107x5.pdf [file hdy2016107x5.pdf]

| Chr | Scaffold   | Start   | End     | Size   |
|-----|------------|---------|---------|--------|
| 9   | Hmel209007 | 4344840 | 4364959 | 20119  |
| 15  | Hmel215006 | 1190144 | 1196212 | 6068   |
| 18  | Hmel218003 | 221730  | 429239  | 207509 |
| 21  | Hmel221012 | 779541  | 796444  | 16903  |
| 2   | Hmel202004 | 1537111 | 1543050 | 5939   |
| 21  | Hmel221001 | 297653  | 480497  | 182844 |
| 2   | Hmel202006 | 1791672 | 1816820 | 25148  |
| 2   | Hmel202006 | 1804029 | 1835608 | 31579  |
| 2   | Hmel202006 | 4165194 | 4171714 | 6520   |
| 15  | Hmel215047 | 2849864 | 2859210 | 9346   |
| 19  | Hmel219018 | 354635  | 361054  | 6419   |

| BayeScan log(PO) | BayPass mean XtX | Freq in <i>H. melpomene</i> | Freq in <i>H. cydno</i> |
|------------------|------------------|-----------------------------|-------------------------|
| 1.7222           | 7.95239143       | 0                           | 0.93                    |
| 1.8414           | 8.78515118       | 0                           | 1                       |
| 1.894            | 8.75630075       | 0                           | 1                       |
| 1.72             | 8.35788884       | 0                           | 0.93                    |
| Not Significant  | 3.97886586       | 0.65                        | 0.71                    |
| Not Significant  | 3.56709747       | 0.55                        | 0.5                     |
| 1.5501           | Not Significant  | 0                           | 0.79                    |
| 1.0762           | Not Significant  | 0.05                        | 1                       |
| 0.99213          | Not Significant  | 0                           | 0.93                    |
| 0.97681          | Not Significant  | 0.05                        | 1                       |
| 1.2169           | Not Significant  | 0                           | 1                       |

Hmel2 annotation

HMEL009267

intergenic (upstream of *cortex*)

OBP41

HMEL013558

HMEL013559

HMEL003174

HMEL003175

HMEL003862

HMEL003863

HMEL016617

HMEL016621

HMEL016620

intergenic

HMEL011045

HMEL011044

HMEL011042

HMEL011043

HMEL011041

HMEL011040

HMEL011037

HMEL011039

HMEL011038

HMEL015626

HMEL015625

HMEL015624

HMEL012374

HmGr58

HmGr59

HmGr60

HmGr61

HmGr64

HmGr65
